# Supplementary material for: Strong room-temperature ferromagnetism in VSe2 monolayers on van der Waals substrates
Source: Springer Nature journal article supplement (doi:10.1038/s41565-018-0063-9), 2018-02-16
Supplement: 41565_2018_63_MOESM1_ESM.pdf [file 41565_2018_63_MOESM1_ESM.pdf]

In the format provided by the authors and unedited.

# Strong room-temperature ferromagnetism in $VSe_2$ monolayers on van der Waals substrates

Manuel Bonilla, Sadhu Kolekar, Yujing Ma, Horacio Coy Diaz, Vijaysankar Kalappattil, Raja Das, Tatiana Eggers, Humberto R. Gutierrez, Manh-Huong Phan and Matthias Batzill\*

---

Department of Physics, University of South Florida, Tampa, FL, USA. \*e-mail: [mbatzill@usf.edu](mailto:mbatzill@usf.edu)

Supplementary Information:

### Strong Room Temperature Ferromagnetism in VSe<sub>2</sub> Monolayer on van der Waals substrates

Manuel Bonilla, Sadhu Kolekar, Yujing Ma, Horacio Coy Diaz, Vijaysankar Kalappattil, Raja Das, Tatiana Eggers, Humberto R. Gutierrez, Manh-Huong Phan, Matthias Batzill

Supplementary Fig. 1

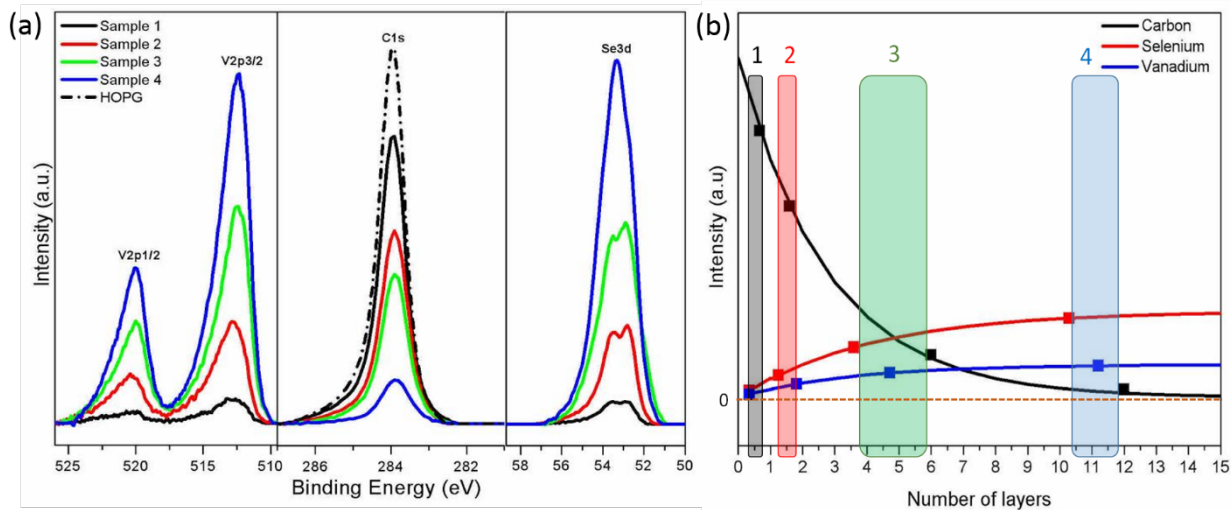

**Fig. S1:** XPS analysis of VSe<sub>2</sub> film growth. XPS data for V-2p, C-1s, and Se-3d core levels for the four films magnetic measurements are discussed are shown in (a). The intensity analysis for estimating the film thickness is shown in (b). The widths of the colored bars represent the estimated uncertainty in the number of layers for these samples.

Supplementary Fig. 2

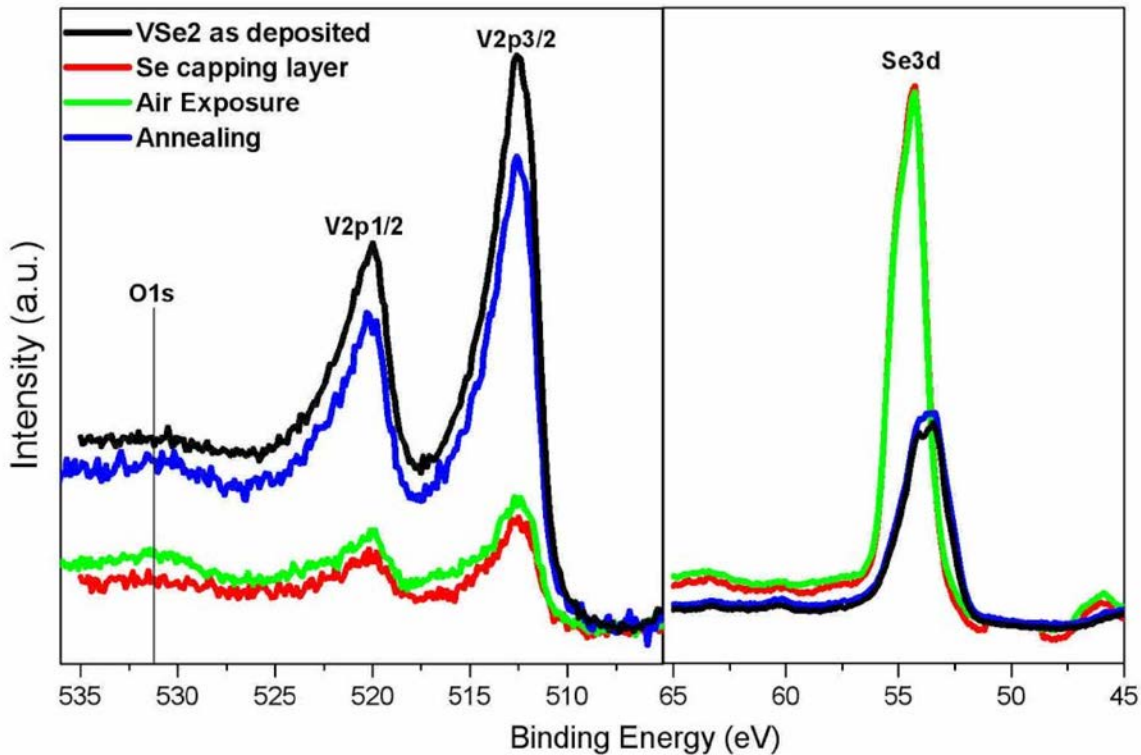

**Fig. S2:** Air stability of Se-capped VSe<sub>2</sub> ultrathin films. XPS analysis of protection of a VSe<sub>2</sub> film from air exposure with a Se capping layer. V-2p and Se-3d core level peaks are shown for the following sequential sample history: (i) an as-grown film (black), (ii) after capping the film with ~ 10 nm Se layer (red), (iii) exposure to air for 30 h and reintroduced into the vacuum chamber (green), (iv) removal of the Se-capping layer by annealing at 300 °C in UHV (blue). The vanadium and selenium peaks appear almost identical for the as-grown film and after removal of the Se-capping layer, indicating that air exposure does not oxidize or alter the VSe<sub>2</sub> film.

### Supplementary Fig. 3

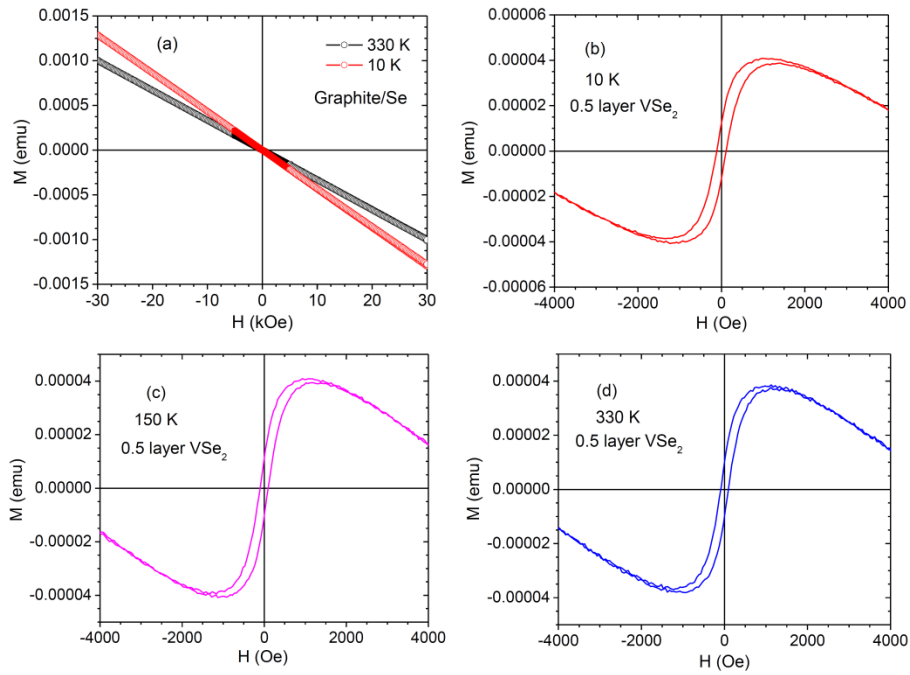

**Fig. S3:** Diamagnetism of HOPG with Se capping layer (control sample) and intrinsic ferromagnetism of monolayer 1T- $VSe_2$ . (a) Linear field dependence of magnetization  $M(H)$  taken at 10 and 330 K indicates a diamagnetic background of the graphite-substrate with Se-capping layer, while well-defined hysteresis loops without subtracting the diamagnetic background of the graphite/Se-capping taken at various temperatures 10 K (b), 150 K (c), and 330 K (d) evidence the strong, intrinsic ferromagnetic ordering above room temperature for monolayer 1T- $VSe_2$ .

Supplementary Fig. 4

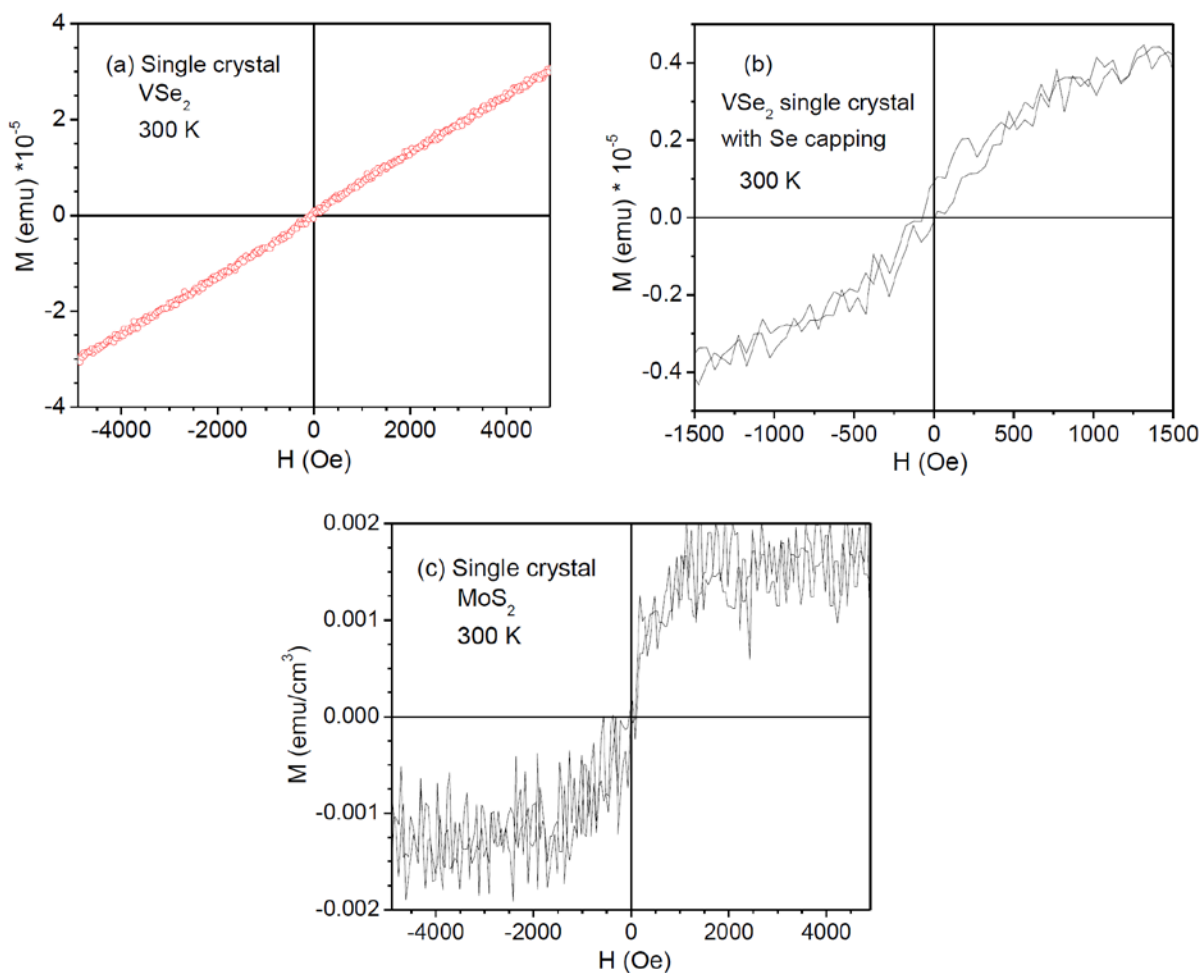

**Fig. S4:** Paramagnetism of bulk  $VSe_2$  and weak magnetism of bulk  $MoS_2$ . (a) Linear field dependence of magnetization  $M(H)$  taken at 300 K indicates the paramagnetic nature of bulk  $VSe_2$ , which is in full agreement with the previous reports<sup>1,2</sup>. (b) The nearly linear behavior of the  $M$ - $H$  curve taken at 300 K for bulk  $VSe_2$  with a 10 nm Se capping layer excludes a surface effect as the origin of strong ferromagnetism. Therefore, the observation of intrinsic room temperature ferromagnetism in monolayers of  $VSe_2$  grown on HOPG or  $MoS_2$  substrates (Figs. 3 and 4b) indicates an important effect of reduced dimensionality on magnetic ordering in a TMD; (c) Bulk  $MoS_2$  shows an extremely weak ferromagnetism, which is consistent with the previous observation<sup>3</sup>. This confirms that the room temperature ferromagnetism observed in monolayers of  $VSe_2$  grown on  $MoS_2$  substrates (Fig. 4) is intrinsic to the  $VSe_2$  layer.

### Supplementary Fig. 5

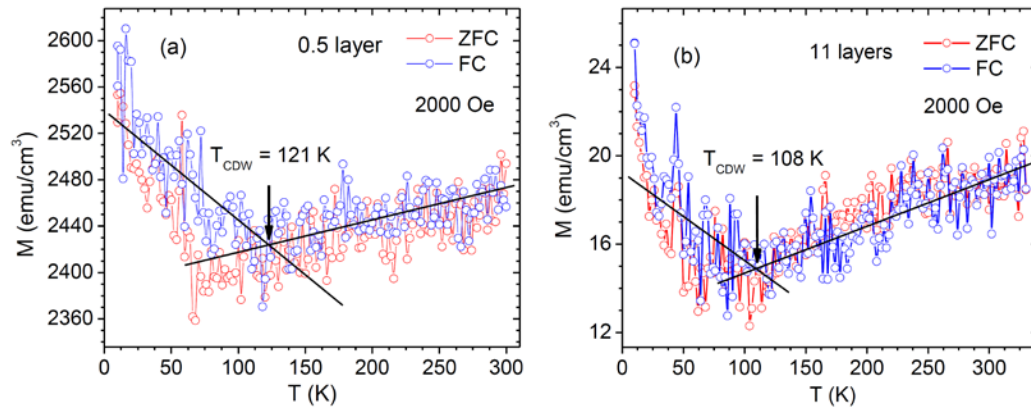

**Fig. S5:** Temperature dependence of zero-field-cooled (ZFC) and field-cooled (FC) magnetization of single- and multi-layers of  $\text{VSe}_2$ : determination of CDW transition. Temperature dependences of zero-field-cooled (ZFC) and field-cooled (FC) magnetization of single- and multi-layers of  $\text{VSe}_2$  show noted up-turns in the ZFC/FC magnetization with lowering temperature, which are defined as the charge density wave (CDW) transition temperatures  $T_{\text{CDW}}$ .  $T_{\text{CDW}}$  is 121 K and 108 K for 0.5 and 11 layers of  $\text{VSe}_2$ , respectively. These values of  $T_{\text{CDW}}$  match well with those determined from the temperature dependence of saturation magnetization (Fig. 3d).

### References

- <sup>1</sup>van Bruggen, C.F., Haas, C. Magnetic susceptibility and electrical properties of  $\text{VSe}_2$  single crystals. *Solid State Commun.* **20**, 251-254 (1976).
- <sup>2</sup> Bayard, M., Sienko, M.J. Anomalous electric and magnetic properties of vanadium diselenide. *J.Solid State Chem.* **19**, 325-329 (1976).
- <sup>3</sup> Tongay, S., Varnoosfaderani, S.S., Appleton, B.R., Junqiao Wu, J.Q., Hebard, A.F., Magnetic properties of  $\text{MoS}_2$ : Existence of ferromagnetism, *Appl. Phys. Lett.* **101**, 123105 (2012).
